# Supplementary material
Source: HighWire-hosted journal article supplement (https://jnm.snmjournals.org/highwire/filestream/94738/field_highwire_adjunct_files/0/152546_Supplemental_Data.pdf)
Supplement: 152546_Supplemental_Data.pdf [file 152546_Supplemental_Data.pdf]

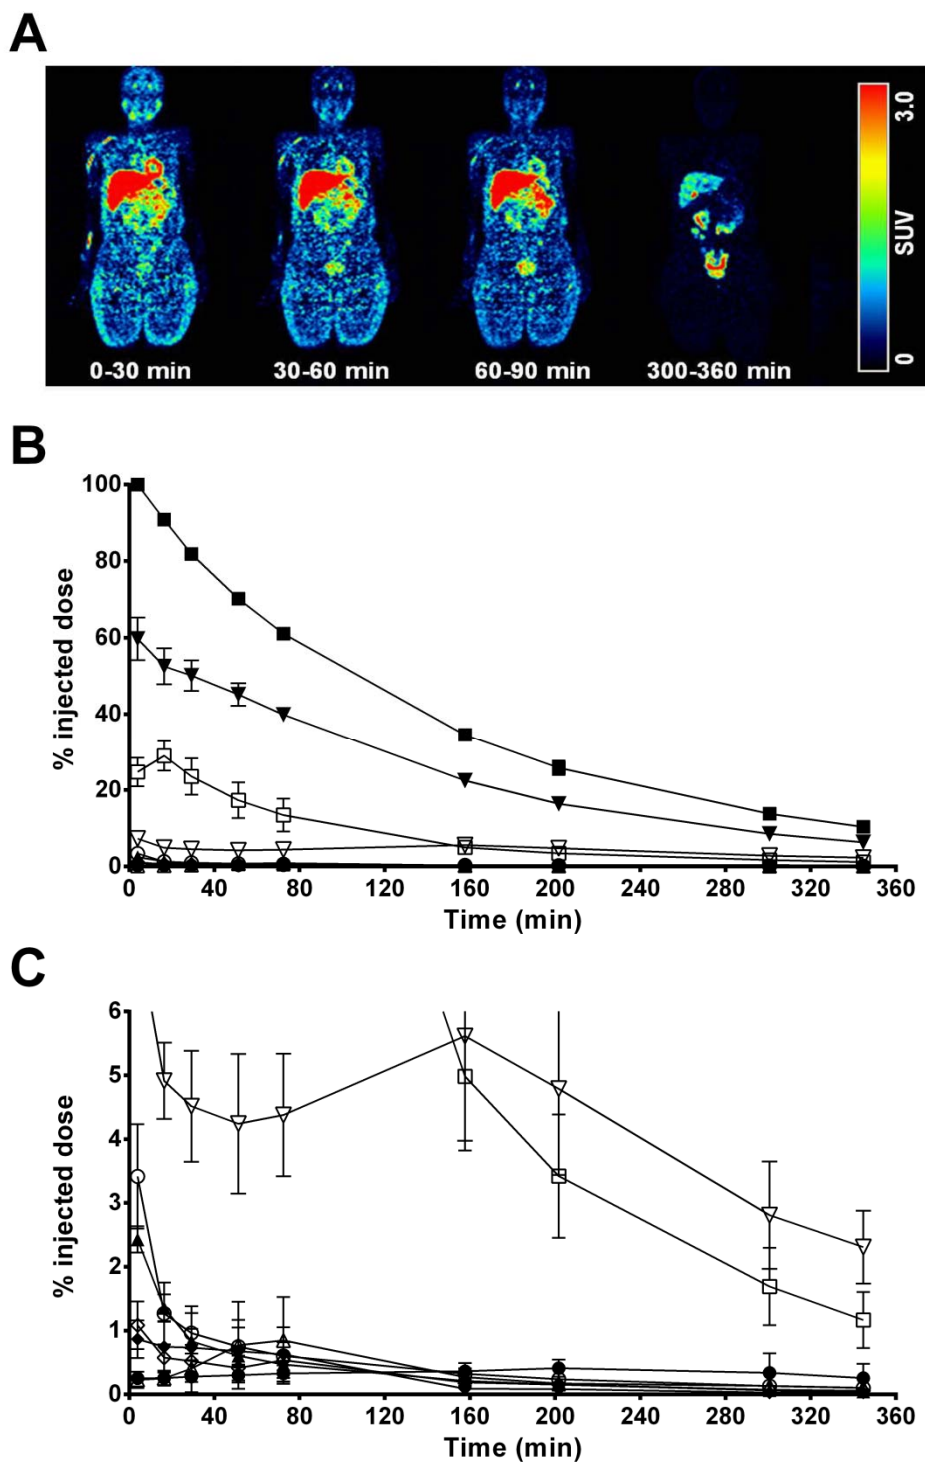

**SUPPLEMENTAL FIGURE 1.** (A) Coronal PET images at selected time points showing the temporal distribution of  $^{18}\text{F}$ -MNI-444. (B) and (C) Source organs time activity curves obtained post intravenous bolus injection of  $^{18}\text{F}$ -MNI-444 (mean  $\pm$  SD,  $n = 4$ ).  $\circ$  = brain;  $\square$  = liver;  $\triangle$  = gallbladder;  $\nabla$  = intestine;  $\diamond$  = kidneys;  $\bullet$  = urinary bladder;  $\blacklozenge$  = spleen;  $\blacktriangle$  = heart;  $\blacktriangledown$  = remainder;  $\blacksquare$  = whole body. Data for the brain, gallbladder, kidneys, urinary bladder, spleen and heart are atop each other.
